# Supplementary material for: Assessment of Mental Health and Quality of Life among University Students during Covid-19 Pandemic in Malaysia, 2021
Source: Research Square preprint supplement (doi:10.21203/rs.3.rs-1756497/v1), 2022-06-14
Supplement: Supplementary file 1 [file 3ff2a0cf5326a6cbd6a123e1.docx]

**TABLES**

Table 1: Social Demographic characteristic of the respondents (N=653)

| Demographic variables | Response | Frequency | Percent |
| --- | --- | --- | --- |
| Age | 18-20 | 206 | 31.5% |
| 21-26 | 423 | 64.8% |
| >27 | 24 | 3.7% |
| Gender | Female | 445 | 68.1% |
| Male | 208 | 31.9% |
| Race | Malay | 501 | 76.7% |
| Chinese | 50 | 7.7% |
| Indian | 47 | 7.2% |
| Others | 55 | 8.4% |
| Level of study | Pre-University | 42 | 6.4% |
| Diploma | 132 | 20.2% |
| Degree | 438 | 67.1% |
| Postgraduate | 41 | 6.3% |
| Year of Study | Year 1 | 180 | 27.6% |
| Year 2 | 104 | 15.9% |
| Year 3 | 208 | 31.9% |
| Year 4 | 134 | 20.5% |
| Year 5 | 27 | 4.1% |
| Type of university | Public | 513 | 78.6% |
| Private | 140 | 21.4% |
| Residency | Alone | 34 | 5.2% |
| With Friend | 130 | 19.9% |
| With Family | 489 | 74.9% |
| Household Income | <RM4849 | 299 | 45.8% |
| RM4850-RM10959 | 226 | 34.6% |
| >RM10960 | 128 | 19.6% |

Table 2: Association of Demographic variable with quality of life (N=653)

|  |
| --- |
| Demographic variables | | Response | Low QOL n(%) | Good QOL n (%) | P value |
| Age | | 18-20 | 91 (13.9%) | 115 (17.6%) | 0.008 |
| 21-26 | 228 (34.9%) | 195 (29.9%) |
| >27 | 7 (1.1%) | 17 (2.6%) |
| Gender | | Female | 232 (35.5%) | 213 (32.6%) | 0.098 |
| Male | 94 (14.4%) | 114 (17.5%) |
| Race | | Malay | 254 (38.9%) | 247 (37.8%) | 0.801 |
| Chinese | 22 (3.4%) | 28 (4.3%) |
| Indian | 24 (3.7%) | 23 (3.5%) |
| Others | 26(4.0%) | 29(4.4%) |
| Level of study | | Pre-University | 15 (2.3%) | 27 (4.1%) | 0.031 |
| Diploma | 66 (10.1%) | 66 (10.1%) |
| Degree | 231 (35.4%) | 207(31.7%) |
| Postgraduate | 14 (2.1%) | 27 (4.1%) |
| Year of Study | | Year 1 | 69 (10.6%) | 111 (17.0%) | 0.005 |
| Year 2 | 54 (8.3%) | 50 (7.7%) |
| Year 3 | 116 (17.8%) | 92 (14.1%) |
| Year 4 | 75 (11.5%) | 59 (9.0%) |
| Year 5 | 12 (1.8%) | 15 (2.3%) |
| Type of university | | Public | 249 (38.1%) | 264 (40.4%) | 0.175 |
| Private | 77 (11.8%) | 63 (9.6%) |
| Residency | | Alone | 17 (2.6%) | 17 (2.6%) | 0.149 |
| With Friend | 55 (8.4%) | 75 (11.5%) |
| With Family | 254 (38.9%) | 235 (36.0%) |
| Household Income | | <RM4849 | 164 (25.1%) | 135 (20.7%) | 0.60 |
| RM4850-RM10959 | 101 (15.5%) | 125 (19.1%) |
| >RM10960 | 61 (9.3%) | 67 (10.3%) |

Table 3: Association of demographic life with Resilience (N=653)

| Demographic variables | Response | Low Resilience n(%) | Normal Resilience n(%) | High Resilience n(%) | P-value |
| --- | --- | --- | --- | --- | --- |
| Age | 18-20 | 69 (10.6%) | 74 (11.3%) | 63 (9.6%) | 0.274 |
| 21-26 | 150 (23.0%) | 178 (27.3%) | 95 (14.5%) |
| >27 | 8 (1.2%) | 10 (1.5%) | 6 (0.9%) |
| Gender | Female | 143 (21.9%) | 188 (28.8%) | 114 (17.5%) | 0.106 |
| Male | 84 (12.9%) | 74 (11.3%) | 50 (7.7%) |
| Race | Malay | 158 (24.2%) | 220 (33.7%) | 123 (18.8%) | 0.009 |
| Chinese | 20 (3.1%) | 16 (2.5%) | 14 (2.1%) |
| Indian | 25 (3.8%) | 12 (1.8%) | 10 (1.5%) |
| Others | 24 (3.7%) | 14 (2.1%) | 17 (2.6%) |
| Level of study | Pre-University | 18 (2.8%) | 17 (2.6%) | 7 (1.1%) | 0.013 |
| Diploma | 53 (8.1%) | 59 (9.0%) | 20 (3.1%) |
| Degree | 138 (21.1%) | 170 (26.0%) | 130 (19.9%) |
| Postgraduate | 18 (2.8%) | 16 (2.5%) | 7 (1.1%) |
| Year of Study | Year 1 | 60 (9.2%) | 70 (10.7%) | 50 (7.7%) | 0.240 |
| Year 2 | 39 (6.0%) | 32 (4.9%) | 33 (5.1%) |
| Year 3 | 69 (10.6%) | 89 (13.6%) | 50 (7.7%) |
| Year 4 | 51 (7.8%) | 56 (8.6%) | 27 (4.1%) |
| Year 5 | 8 (1.2%) | 15 (2.3%) | 4 (0.6%) |
| Type of university | Public | 166 (25.4%) | 212 (32.5%) | 135 (20.7%) | 0.045 |
| Private | 61 (9.3%) | 50 (7.7%) | 29 (4.4%) |
| Residency | Alone | 15 (2.3%) | 13 (2.0%) | 6 (0.9%) | 0.446 |
| With Friend | 51 (7.8%) | 50 (7.7%) | 29 (4.4%) |
| With Family | 161 (24.7%) | 199 (30.5%) | 129 (19.8%) |
| Household Income | <RM4849 | 99 (15.2%) | 124 (19.0%) | 76 (11.6%) | 0.442 |
| RM4850-RM10959 | 79 (12.1%) | 84 (12.9%) | 63 (9.6%) |
| >RM10960 | 49 (7.5%) | 54 (8.3%) | 25 (3.8%) |
| TOTAL |  | 227 | 262 | 164 |  |

Table 4: Association of demographic life with Paranoia 1 among respondents (N=653)

|  |  | Average | Elevated | Moderately severe | Severe | Very severe | P- value |
| --- | --- | --- | --- | --- | --- | --- | --- |
| Age | 18-20 | 46 (7.0%) | 78 (11.9%) | 50 (7.7%) | 22 (3.4%) | 10 (1.5%) | 0.002 |
| 21-26 | 113 (17.3%) | 129 (19.8%) | 102 (15.6%) | 46 (7.0%) | 33 (5.1%) |
| >27 | 3 (0.5%) | 16 (2.5%) | 0 (0.0%) | 1 (0.2%) | 4 (0.6%) |
| Gender | Female | 102 (15.6%) | 148 (22.7%) | 112 (17.2%) | 52 (8.0%) | 31 (4.7%) | 0.182 |
| Male | 60 (9.2%) | 75 (11.5%) | 40 (6.1%) | 17 (2.6%) | 16 (2.5%) |
| Race | Malay | 128 (19.6%) | 168 (25.7%) | 114 (17.5%) | 53 (8.1%) | 38 (5.8%) | 0.940 |
| Chinese | 12 (1.8%) | 17 ((2.6%) | 11 (1.7%) | 6 (0.9%) | 4 (0.6%) |
| Indian | 9 (1.4%) | 17 (2.6%) | 11 (1.7%) | 7 (1.1%) | 3 (0.5%) |
| Others | 13 (2.0%) | 21 (3.2%) | 16 (2.5%) | 3 (0.5%) | 2 (0.3%) |
| Level of study | Pre-University | 14 (2.1%) | 17 (2.6%) | 8 (1.2%) | 2 (0.3%) | 1 (0.2%) | 0.027 |
| Diploma | 22 (3.4%) | 43 (6.6%) | 40 (6.1%) | 18 (2.8%) | 9 (1.4%) |
| Degree | 118 (18.1%) | 142 (21.7%) | 98 (15.0%) | 48 (7.4%) | 32 (4.9%) |
| Postgraduate | 8 (1.2%) | 21 (3.2%) | 6 (0.9%) | 1 (0.2%) | 5 (0.8%) |
| Year of Study | Year 1 | 45 (6.9%) | 67 (10.3%) | 41 (6.3%) | 15 (2.3%) | 12 (1.8%) | 0.691 |
| Year 2 | 25 (3.8%) | 41 (6.3%) | 22 (3.4%) | 11 (1.7%) | 5 (0.8%) |
| Year 3 | (7.8%) | 61 (9.3%) | 52 (8.0%) | 28 (4.3%) | 16 (2.5%) |
| Year 4 | 30 (4.6%) | 45 (6.9%) | 33 (5.1%) | 13 (2.0%) | 13 (2.0%) |
| Year 5 | 11 (1.7%) | 9 (1.4%) | 4 (0.6%) | 2 (0.3%) | 1 (0.2%) |
| Type of university | Public | 134 (20.5%) | 182 (27.9%) | 113 (17.3%) | 48 (7.4%) | 36 (5.5%) | 0.094 |
| Private | 28 (4.3%) | 41 6.3%) | 39 (6.0%) | 21 (3.2%) | 11 (1.7%) |
| Residency | Alone | 6 (0.9%) | 14 (2.1%) | 7 (1.1%) | 1 (0.2%) | 6 (0.9%) | 0.246 |
| With Friend | 29(4.4%) | 48 (7.4%) | 32 (4.9%) | 14 (2.1%) | 7 (1.1%) |
| With Family | 127 (19.4%) | 161 (24.7%) | 113 (17.3%) | 54 (8.3%) | 34 (5.2%) |
| Household Income | <RM4849 | 81 (12.4%) | 105 (16.1%) | 70 (10.7%) | 27 (4.1%) | 16 (2.5%) | 0.586 |
| RM4850-RM10959 | 54 (8.3%) | 77 (11.8%) | 52 (8.0%) | 24 (3.7%) | 19 (2.9%) |
| >RM10960 | 27 (4.1%) | 41 (6.3%) | 30 (4.6%) | 18 (2.8%) | 12 (1.8%) |

Table 5: Association of demographic life with Paranoia 2 among respondents (N=653)

|  |  | Average | Elevated | Moderately severe | Severe | Very severe | P- value |
| --- | --- | --- | --- | --- | --- | --- | --- |
| Age | 18-20 | 42 (6.4%) | 61 (9.3%) | 55 (8.4%) | 37 (5.7%) | 11 (1.7%) | 0.035 |
| 21-26 | 75 (11.5%) | 136 (20.8%) | 81 (12.4%) | 80 (12.3%) | 51 (7.8%) |
| >27 | 3 (0.5%) | 12 (1.8%) | 5 (0.8%) | 4 (0.6%) | 0 (0.0%) |
| Gender | Female | 84 (12.9%) | 143(21.9%) | 96(14.7%) | 78(11.9%) | 44(6.7%) | 0.881 |
| Male | 36 (5.5%) | 66(10.1%) | 45(6.9%) | 43(6.6%) | 18(2.8%) |
| Race | Malay | 97 (14.9%) | 156(23.9%) | 101(15.5%) | 98(15.0%) | 49(7.5%) | 0.498 |
| Chinese | 7 (1.1%) | 17(2.6%) | 15(2.3%) | 8(1.2%) | 3(0.5%) |
| Indian | 7 (1.1%) | 16(2.5%) | 8(1.2%) | 10(1.5%) | 6(0.9%) |
| Others | 9 (1.4%) | 20(3.1%) | 17(2.6%) | 5(0.8%) | 4(0.6%) |
| Level of study | Pre-University | 10 (1.5%) | 11 (1.7%) | 12 (1.8%) | 7 (1.1%) | 2 (0.3%) | 0.200 |
| Diploma | 18 (2.8%) | 44 (6.7%) | 38 (5.8%) | 25 (3.8%) | 7 (1.1%) |
| Degree | 88 (13.5%) | 137 (21.0%) | 78 (11.9%) | 83 (12.7%) | 52 (8.0%) |
| Postgraduate | 4 (0.6%) | 17 (2.6%) | 13 (2.0%) | 6 (0.9%) | 1 (0.2%) |
| Year of Study | Year 1 | 40 (6.1%) | 61 (9.3%) | 42 (6.4%) | 28 (4.3%) | 9 (1.4%) | 0.200 |
| Year 2 | 21 (3.2%) | 31 (4.7%) | 26 (4.0%) | 20 (3.1%) | 6 (0.9%) |
| Year 3 | 32 (4.9%) | 71 (10.9%) | 44 (6.7%) | 35 (5.4%) | 26 (4.0%) |
| Year 4 | 22 (3.4%) | 36 (5.5%) | 26 (4.0%) | 32 (4.9%) | 18 (2.8%) |
| Year 5 | 5 (0.8%) | 10 (1.5%) | 3 (0.5%) | 6 (0.9%) | 3 (0.5%) |
| Type of university | Public | 97 (14.9%) | 170 (26.0%) | 109 (16.7%) | 92 (14.1%) | 45 (6.9%) | 0.520 |
| Private | 23 (3.5%) | 39 (6.0%) | 32 (4.9%) | 29 (4.4%) | 17 (2.6%) |
| Residency | Alone | 2 (0.3%) | 14 (2.1%) | 7 (1.1%) | 7(1.1%) | 4 (0.6%) | 0.096 |
| With Friend | 18 (2.8%) | 33 (5.1%) | 37 (5.7%) | 27 (4.1%) | 15 (2.3%) |
| With Family | 100 (15.3%) | 162 (24.8%) | 97 (14.9%) | 87 (13.3%) | 43 (6.6%) |
| Household Income | <RM4849 | 61 (9.3% | 91 (13.9%) | 69 (10.6%) | 50 (7.7%) | 28 (4.3%) | 0.853 |
| RM4850-RM10959 | 35 (5.4% | 78 (11.9%) | 46 (7.0%) | 46 (7.0%) | 21 (3.2%) |
| >RM10960 | 24 (3.7% | 40 (6.1%) | 26 (4.0%) | 25 (3.8%) | 13 (2.0%) |

Table 6: Relation between quality of life with Resilience and Paranoia among respondents (N=653)

|  |  | Adjusted OR | 95% C.I. | | P value |
| --- | --- | --- | --- | --- | --- |
| Lower | Upper |
| Resilience | Low |  |  |  |  |
|  | Normal | 2.559 | 1.759 | 3.722 | <0.01 |
|  | High | 2.756 | 1.809 | 4.199 | <0.01 |
| Paranoia | Mild |  |  |  |  |
|  | Moderate | 0.763 | 0.508 | 1.147 | 0.193 |
|  | Severe | 0.538 | 0.368 | 0.788 | <0.01 |
